# Supplementary material for: Synthesis of Dipyridylaminoperylenediimide–Metal Complexes and Their Cytotoxicity Studies
Source: MDPI journal article supplement (doi:10.3390/pharmaceutics14122616), 2022-11-27
Supplement: s1 [file s1]

## Supplementary Data

# Synthesis of Dipyrindylaminoperylenediimide– Metal Complexes and Their Cytotoxicity Studies

### Table of Contents

|                                                                                                                                |        |
|--------------------------------------------------------------------------------------------------------------------------------|--------|
| • Figure S1: <sup>1</sup> H NMR spectrum of PDI-2                                                                              | Pag 2  |
| • Figure S2: <sup>13</sup> C NMR spectrum of PDI-2                                                                             | Pag 3  |
| • Figure S3: MALDI-TOF spectrum of PDI-2                                                                                       | Pag 3  |
| • Figure S4: UV-Vis and fluorescence spectra of PDI-2                                                                          | Pag 4  |
| • Figure S5: IR spectrum (KBr) of PDI-2                                                                                        | Pag 4  |
| • Figure S6: <sup>1</sup> H NMR spectrum of PDI-6                                                                              | Pag 5  |
| • Figure S7: <sup>13</sup> C NMR spectrum of PDI-6                                                                             | Pag 5  |
| • Figure S8: MALDI-TOF spectrum of PDI-6                                                                                       | Pag 6  |
| • Figure S9: UV-Vis and fluorescence spectra of PDI-6                                                                          | Pag 6  |
| • Figure S10: IR spectrum (KBr) of PDI-6                                                                                       | Pag 7  |
| • Figure S11: <sup>1</sup> H NMR spectrum of PDI-3                                                                             | Pag 7  |
| • Figure S12: MALDI-TOF spectrum of PDI-3                                                                                      | Pag 8  |
| • Figure S13: IR spectrum (KBr) of PDI-3                                                                                       | Pag 8  |
| • Figure S14: <sup>1</sup> H NMR spectrum of PDI-4                                                                             | Pag 9  |
| • Figure S15: MALDI-TOF spectrum of PDI-4                                                                                      | Pag 9  |
| • Figure S16: IR spectrum (KBr) of PDI-4                                                                                       | Pag 10 |
| • Figure S17: <sup>1</sup> H NMR spectrum of PDI-7                                                                             | Pag 10 |
| • Figure S18: IR spectrum (KBr) of PDI-7                                                                                       | Pag 11 |
| • Figure S19: <sup>1</sup> H NMR spectrum of PDI-8                                                                             | Pag 11 |
| • Figure S20: IR spectrum (KBr) of PDI-8                                                                                       | Pag 12 |
| • Figure S21: UV-Vis spectra of PDI-complexes                                                                                  | Pag 13 |
| • Figure S22: Fluorescence spectra of PDI-3 and PDI-4                                                                          | Pag 13 |
| • Figure S23: UV-Vis spectra of PDI-2, -3, -7, -8 in PBS solution + 5% DMSO at 37.5 °C, at 0 and 24 h.                         | Pag 14 |
| • Figure S24: Dose-response curves of HeLa cells after incubation with cationic PDI-2, -3, -4, and PDI-6, -7, -8 for 24 hours. | Pag 15 |

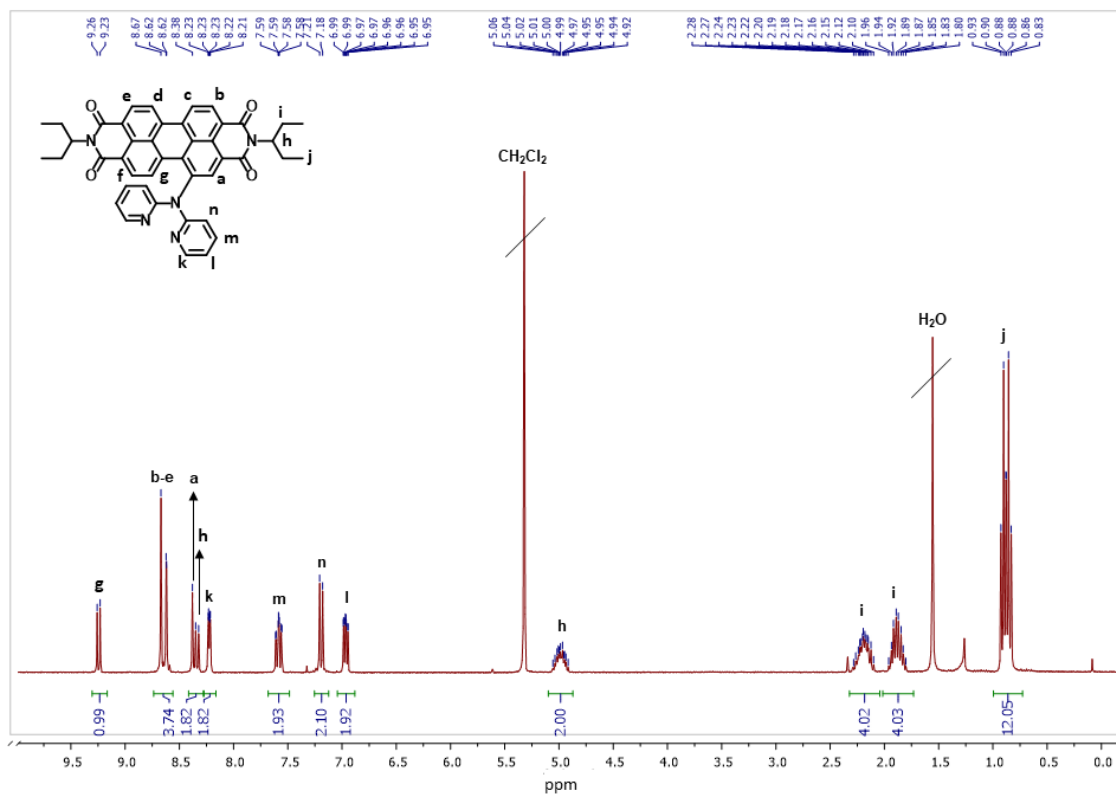

**Figure S1:** <sup>1</sup>H NMR spectrum of PDI-2 in CD<sub>2</sub>Cl<sub>2</sub> (300 MHz, 25 °C)

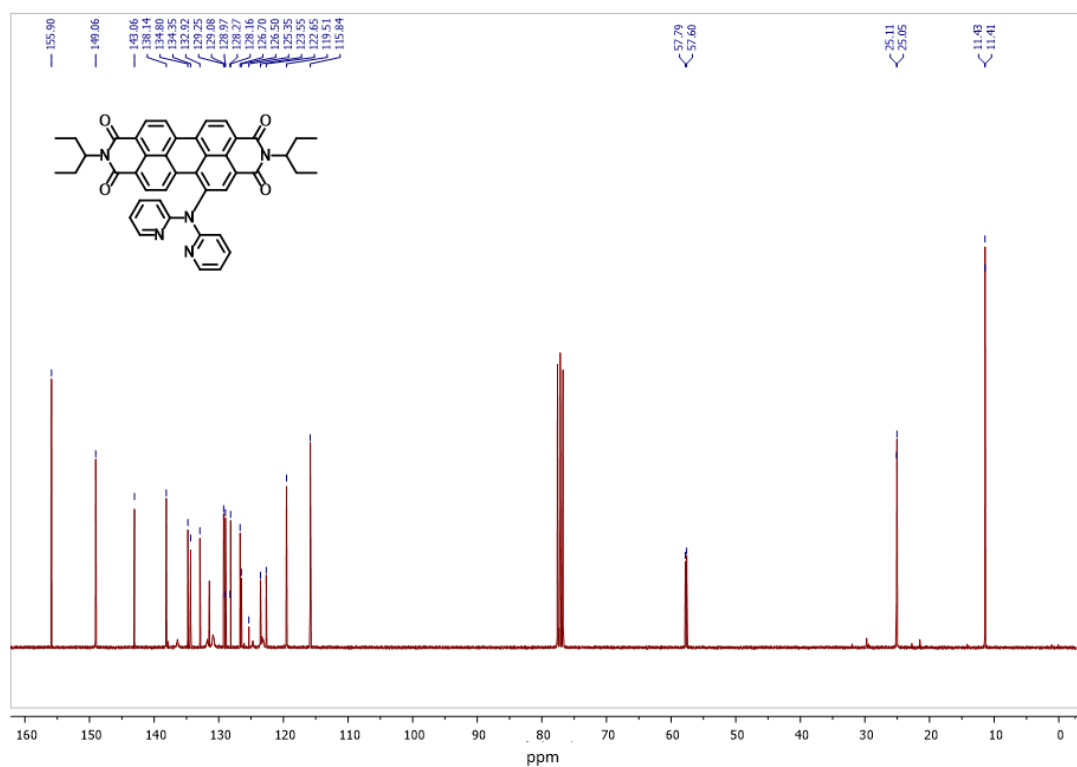

**Figure S2:**  $^{13}\text{C}$  NMR spectrum of PDI-2 in  $\text{CDCl}_3$  (75 MHz, 25 °C)

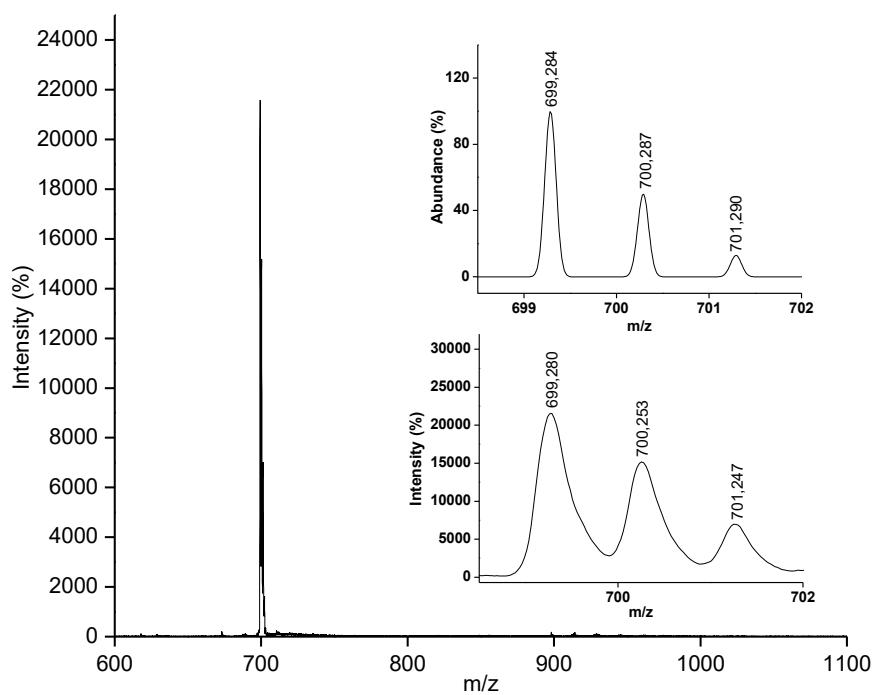

**Figure S3:** MALDI-TOF spectrum of PDI-2

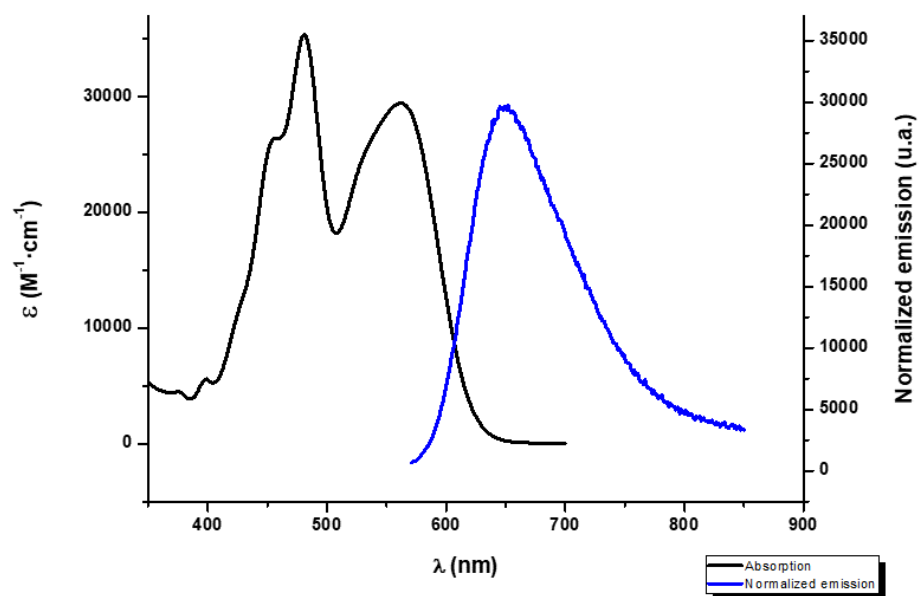

**Figure S4: UV-Vis and fluorescence spectra of PDI-2**

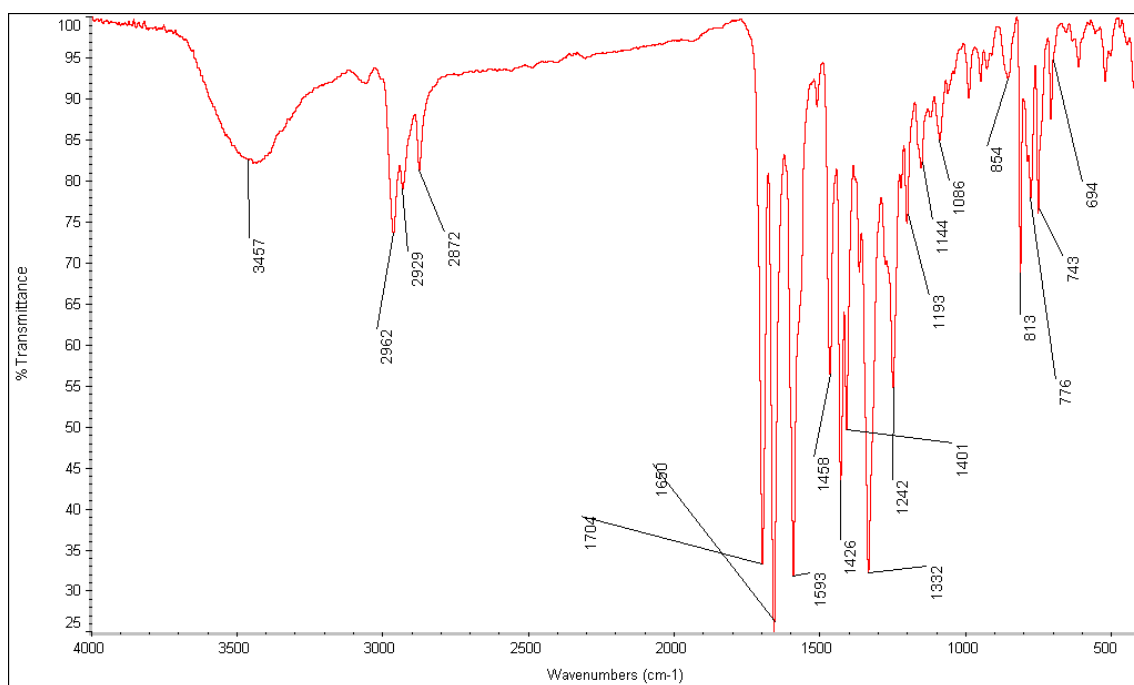

**Figure S5: IR spectrum (KBr) of PDI-2**

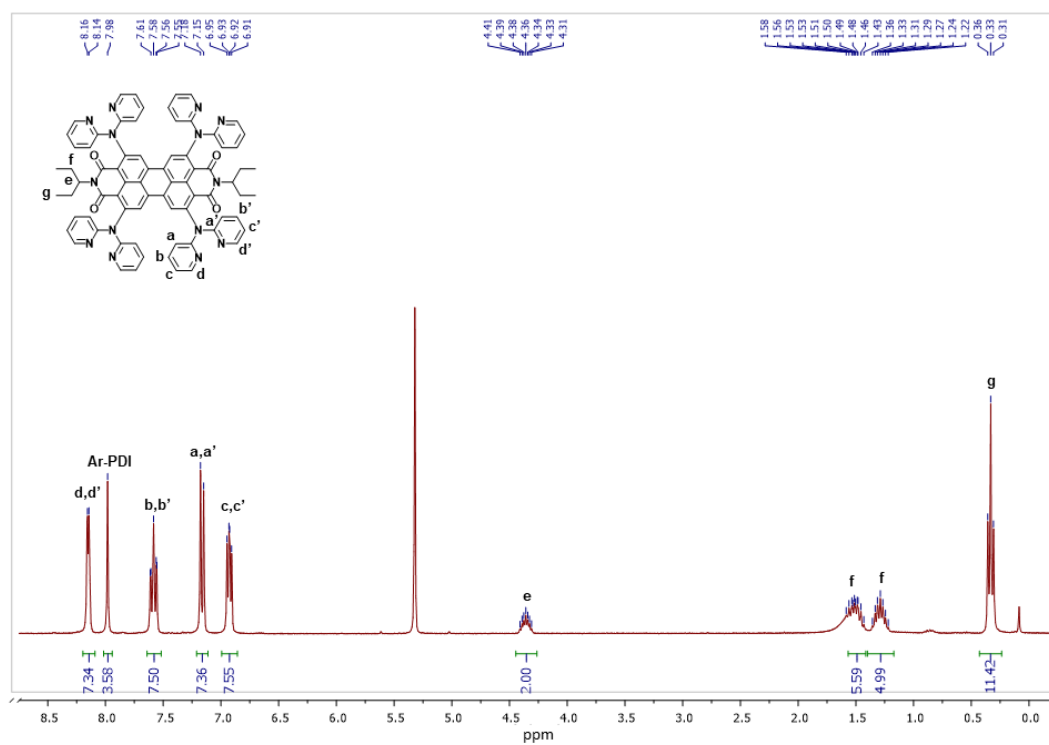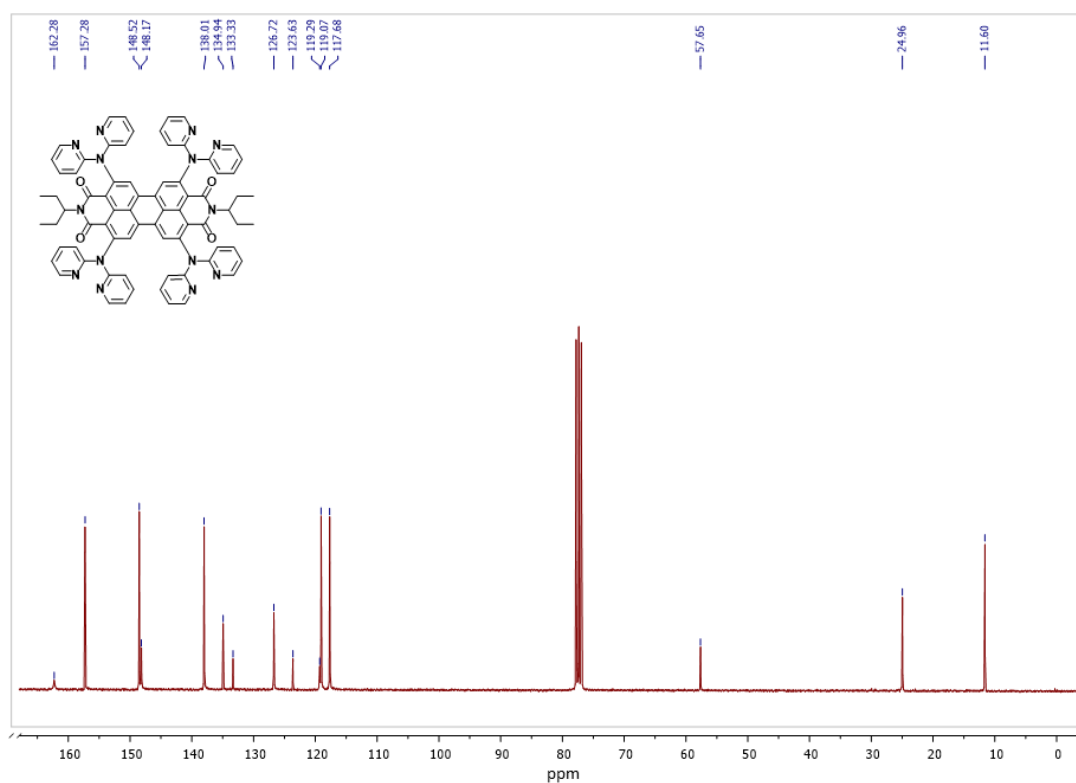

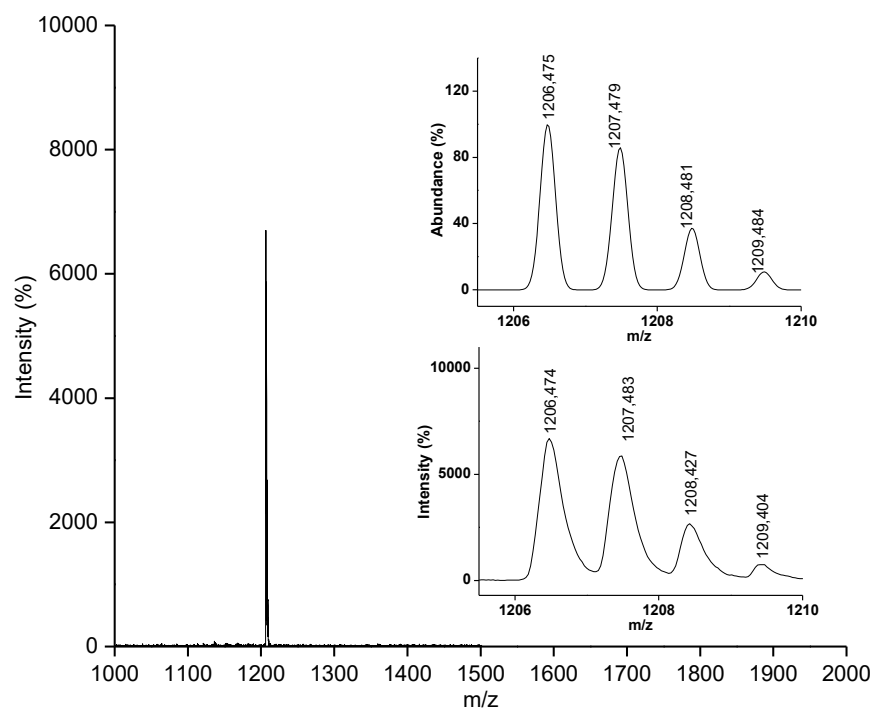

**Figure S8: MALDI-TOF spectrum of PDI-6**

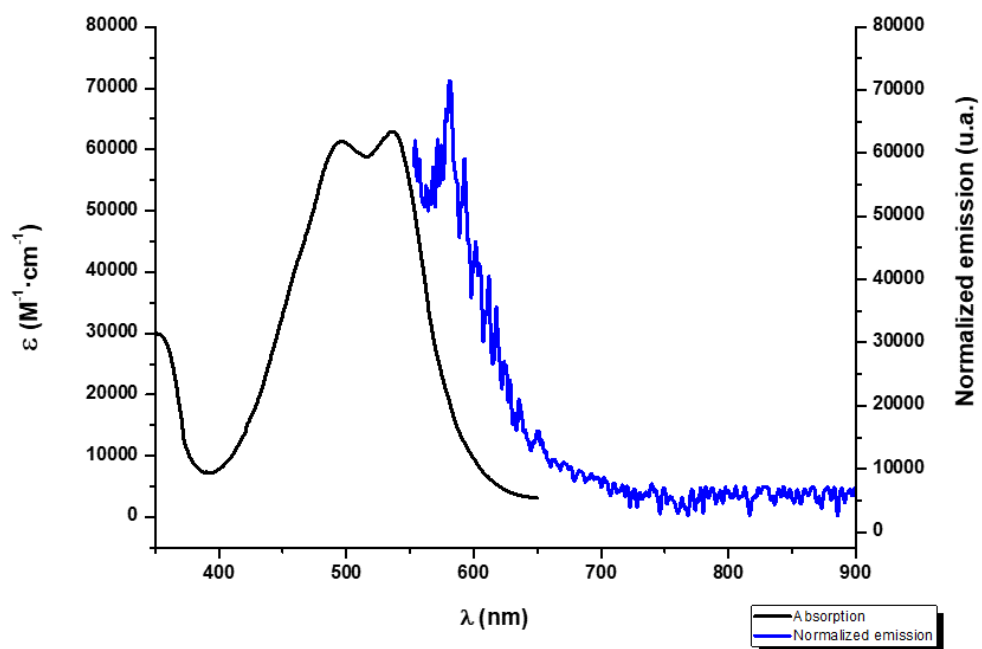

**Figure S9: UV-Vis and fluorescence spectra of PDI-6**

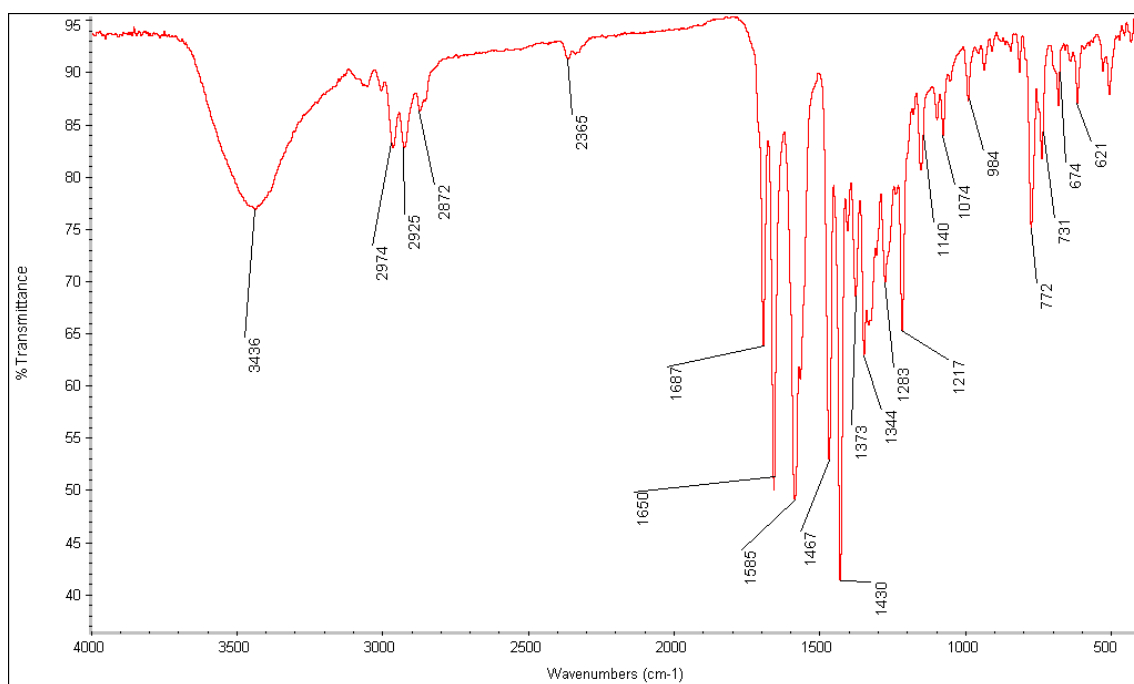

Figure S10: IR spectrum (KBr) of PDI-6

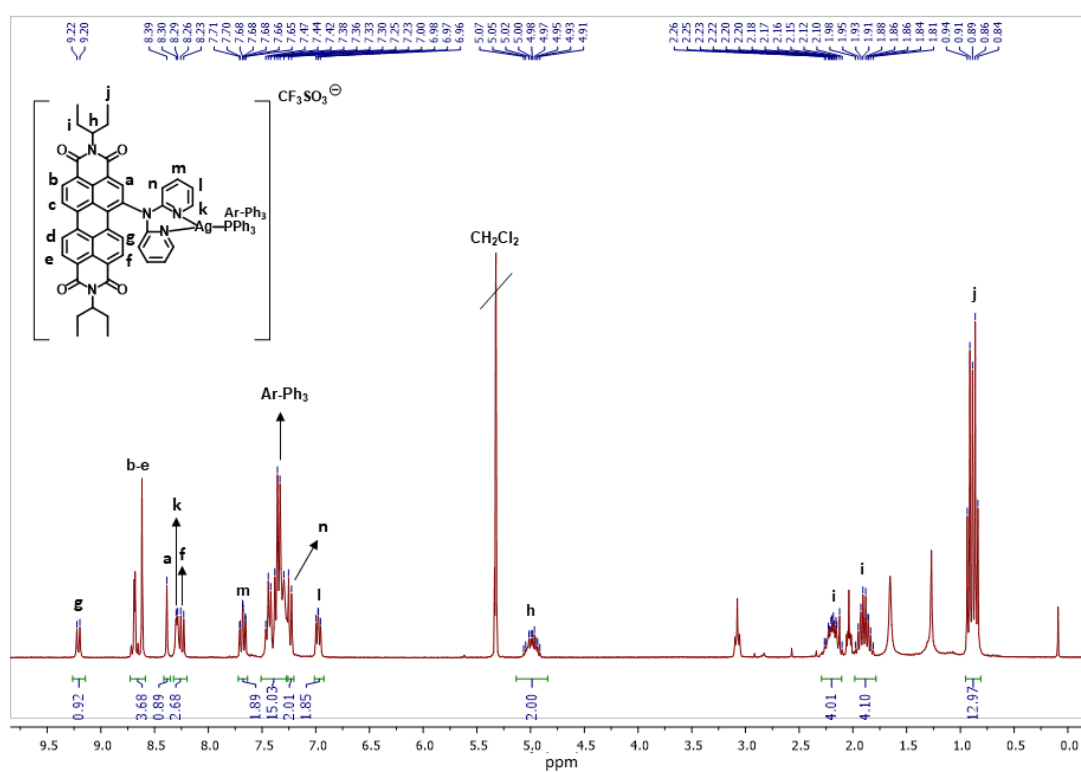

Figure S11: <sup>1</sup>H NMR spectrum of PDI-3 in CD<sub>2</sub>Cl<sub>2</sub> (300 MHz, 25 °C)

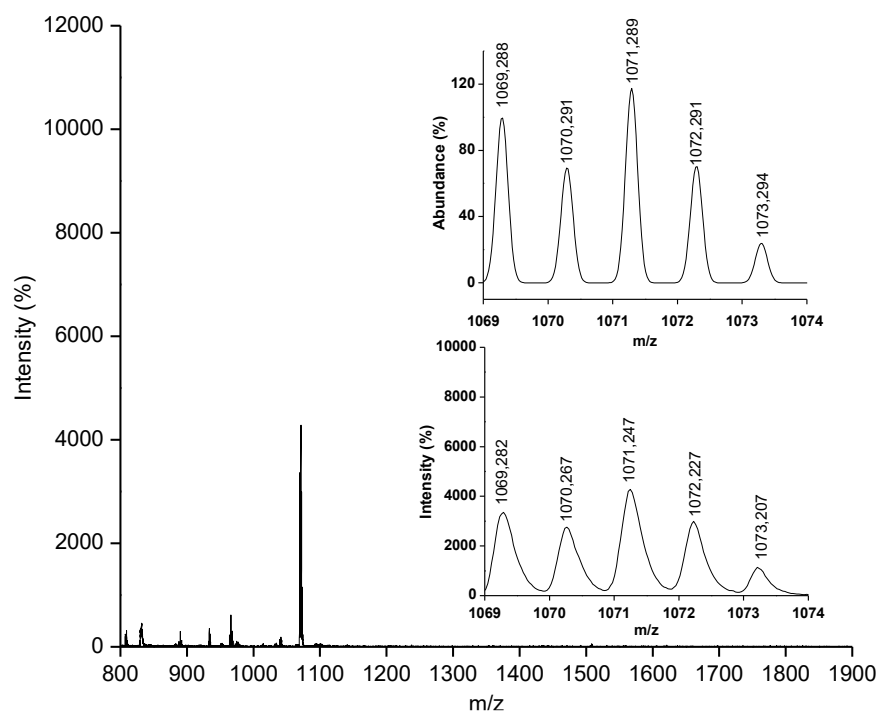

**Figure S12: MALDI-TOF spectrum of PDI-3**

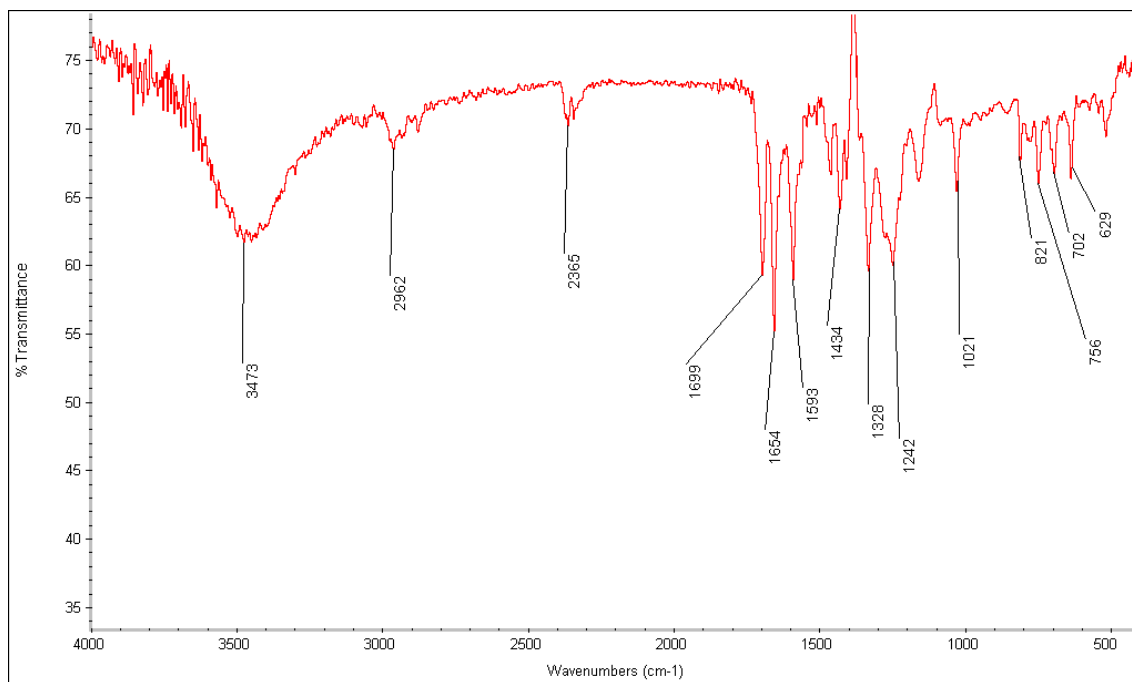

**Figure S13: IR spectrum (KBr) of PDI-3**



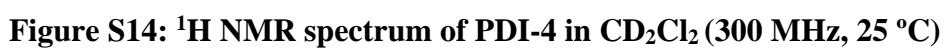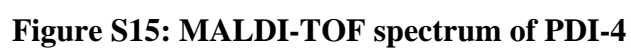

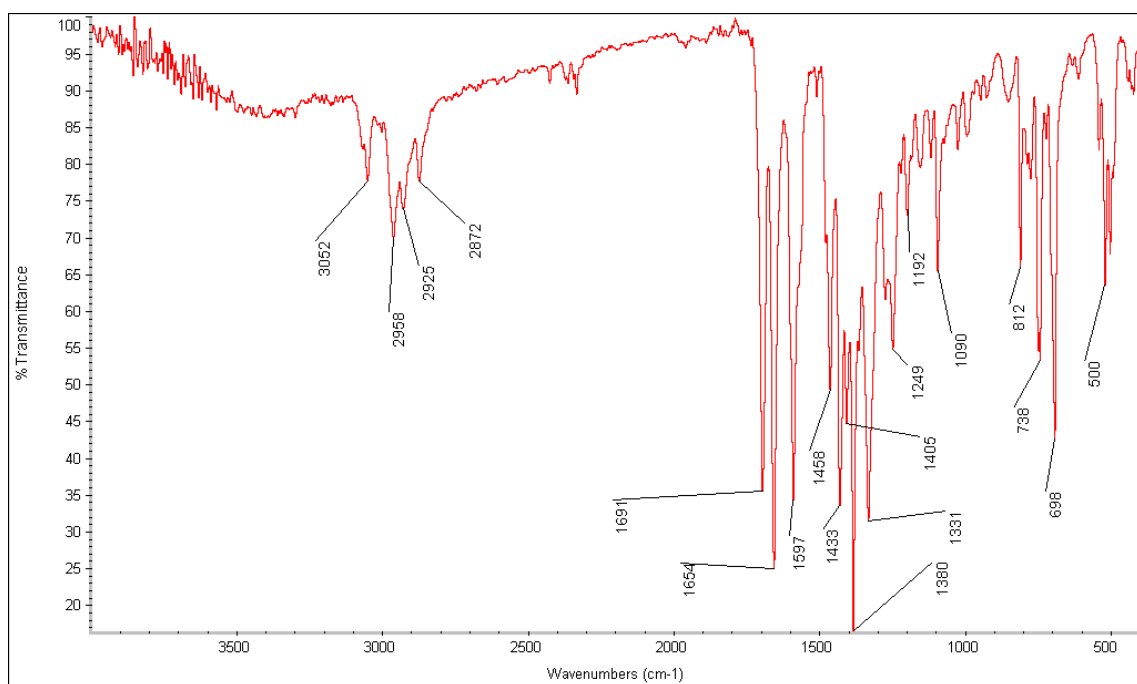

Figure S16: IR spectrum (KBr) of PDI-4

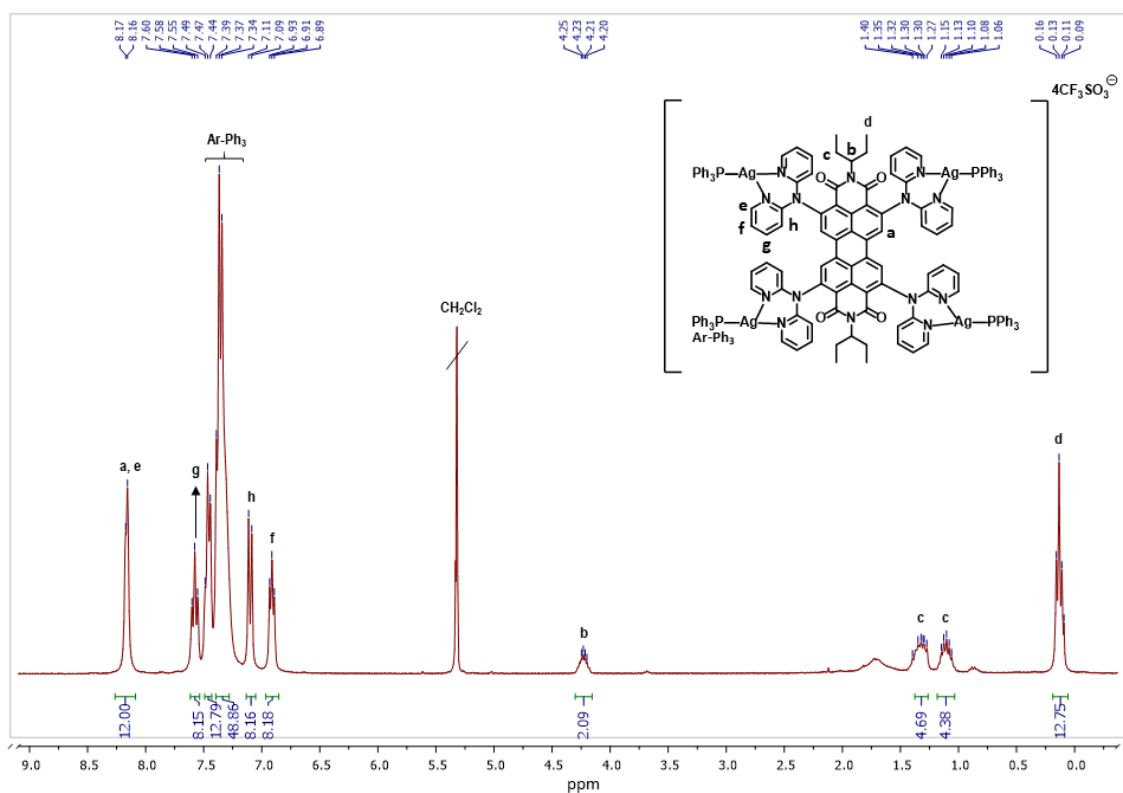

Figure S17: <sup>1</sup>H NMR spectrum of PDI-7 in CD<sub>2</sub>Cl<sub>2</sub> (300 MHz, 25 °C)

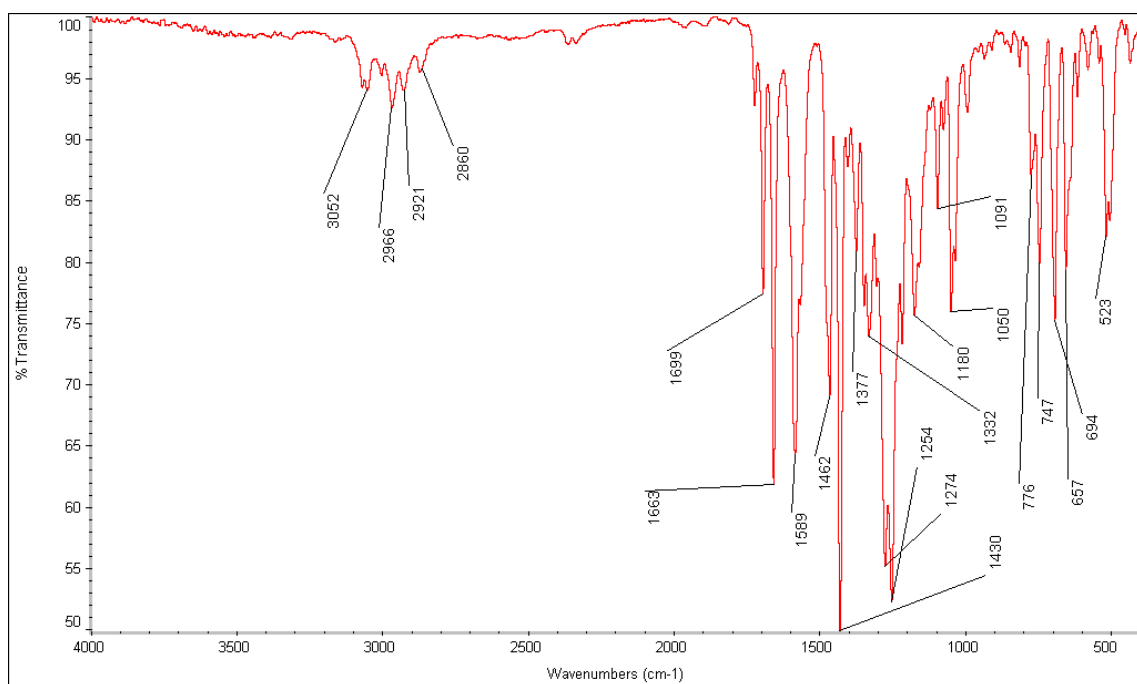

**Figure S18: IR spectrum (KBr) of PDI-7**

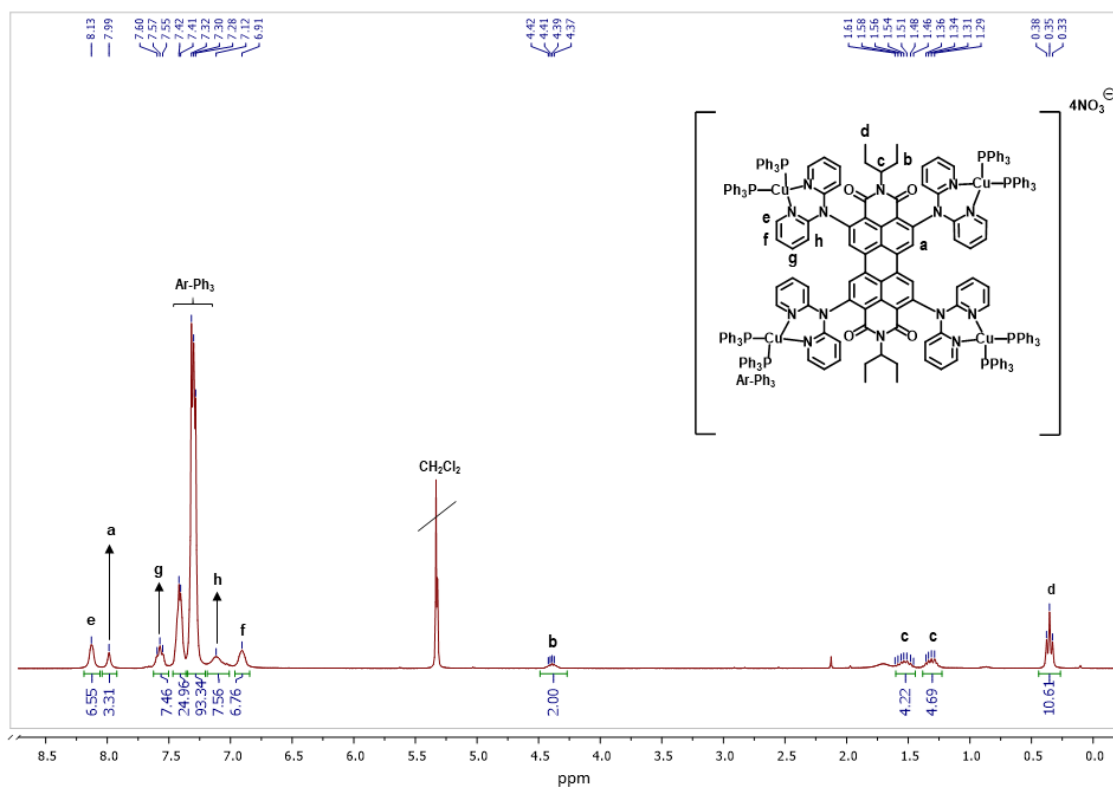

**Figure S19:  $^1\text{H}$  NMR spectrum of PDI-8 in  $\text{CD}_2\text{Cl}_2$  (300 MHz, 25 °C)**

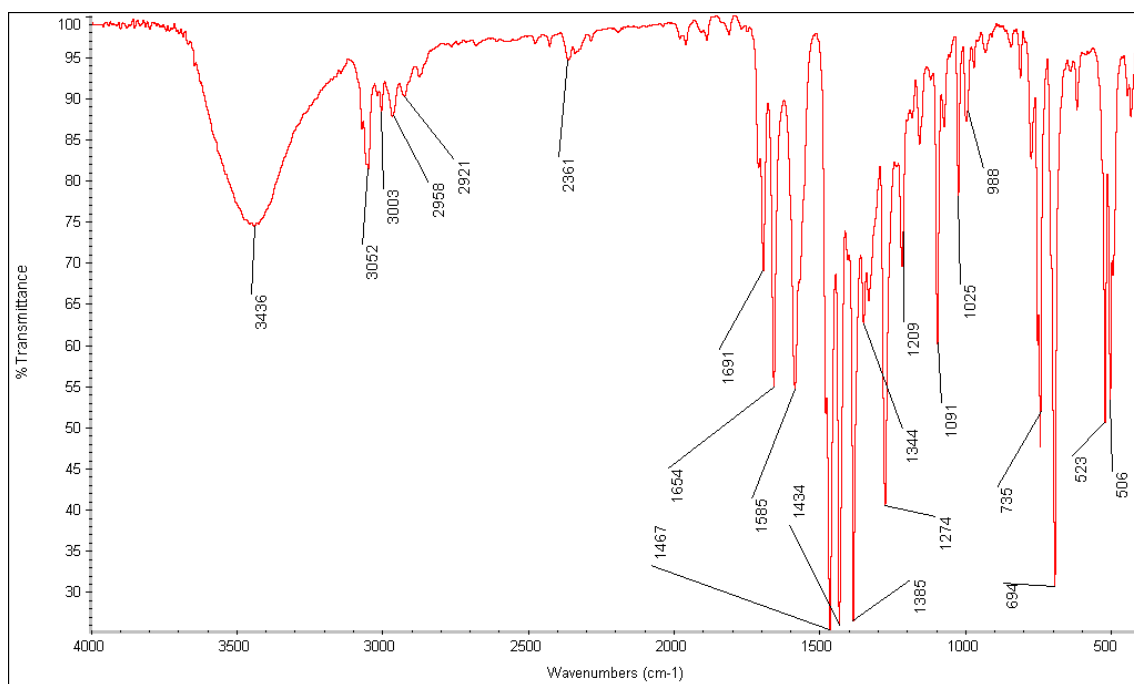

**Figure S20: IR spectrum (KBr) of PDI-8**

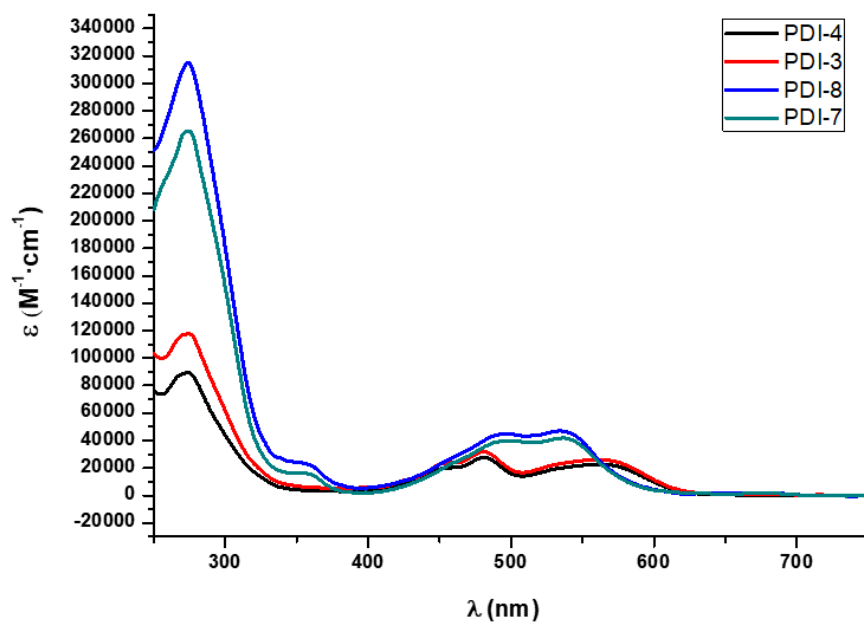

Figure S21: UV-Vis spectra of PDI-complexes ( $\text{CHCl}_3$ )

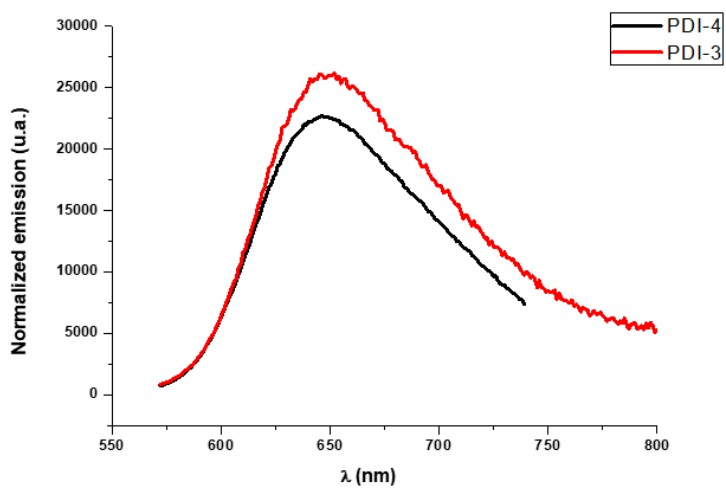

Figure S22: Fluorescence spectra of PDI-3 and PDI-4 ( $\text{CHCl}_3$ )

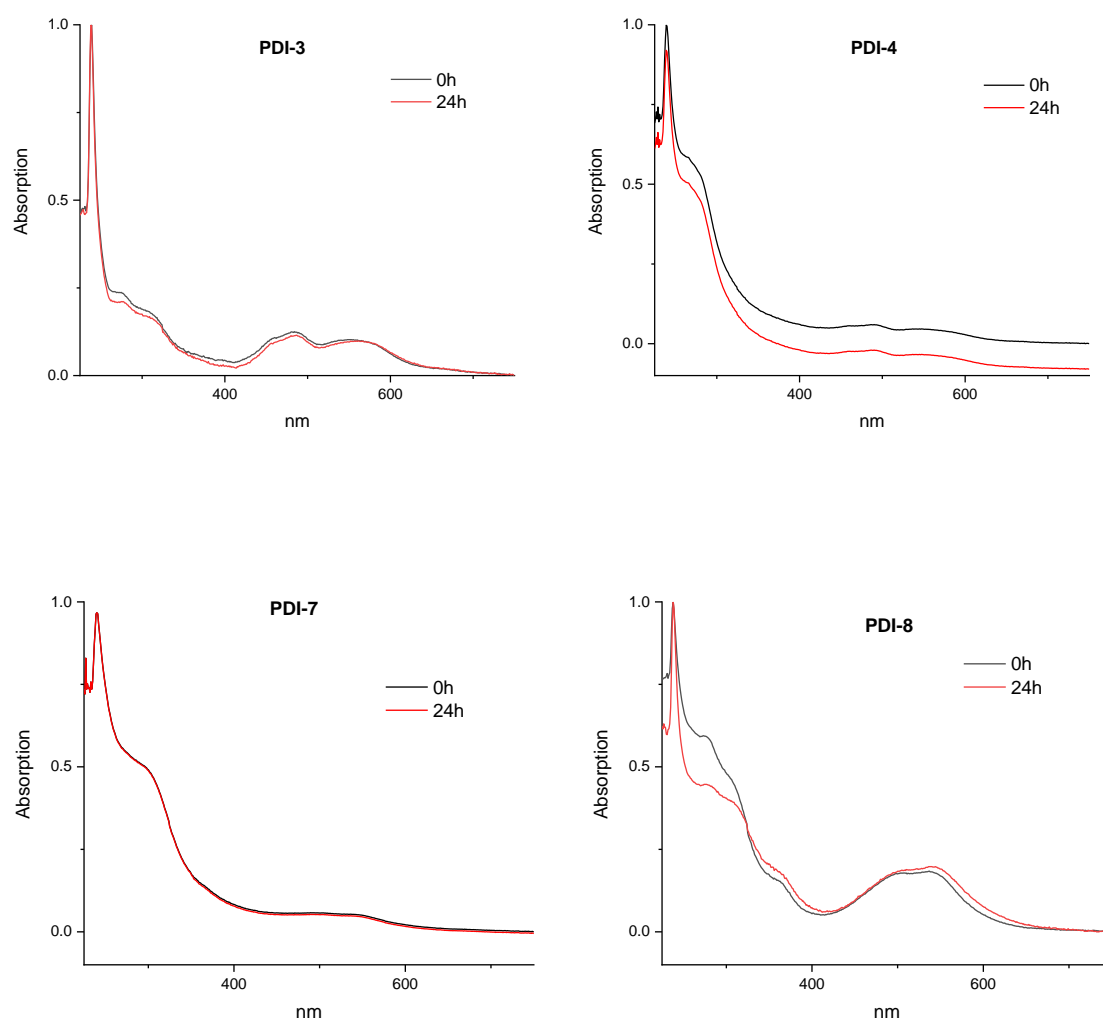

**Figure S23: UV-Vis spectra of PDI-2, -3, -7, -8 in PBS solution + 5% DMSO at 37.5 °C, at 0 and 24 h (concentration  $5 \cdot 10^{-4}$ ).**

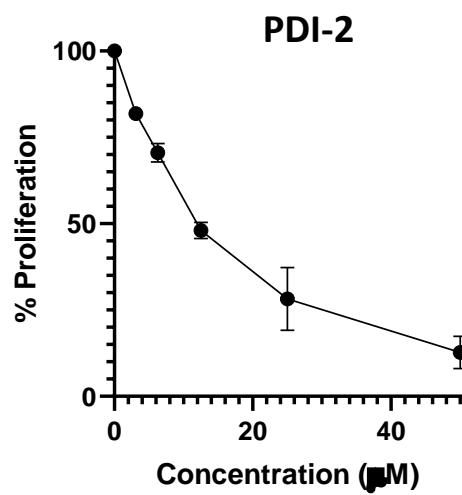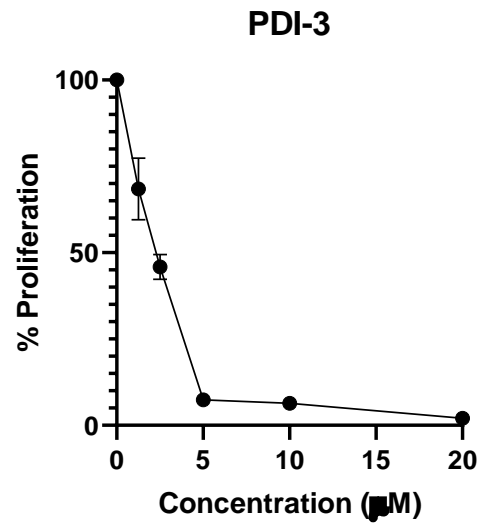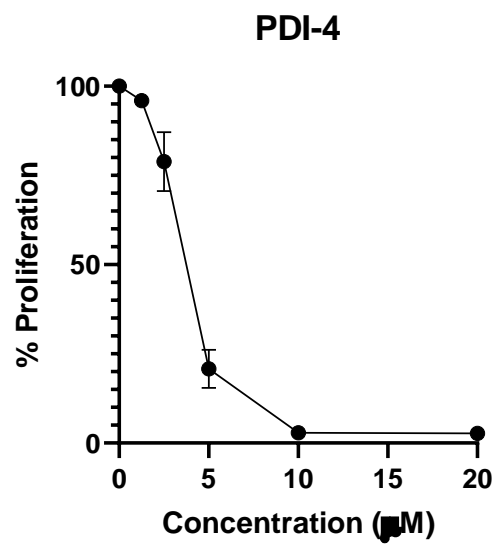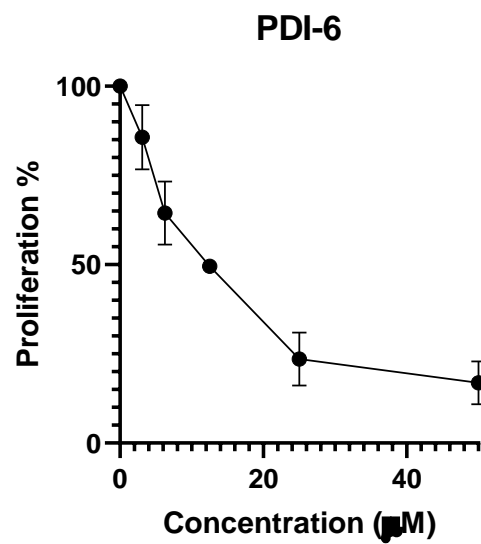

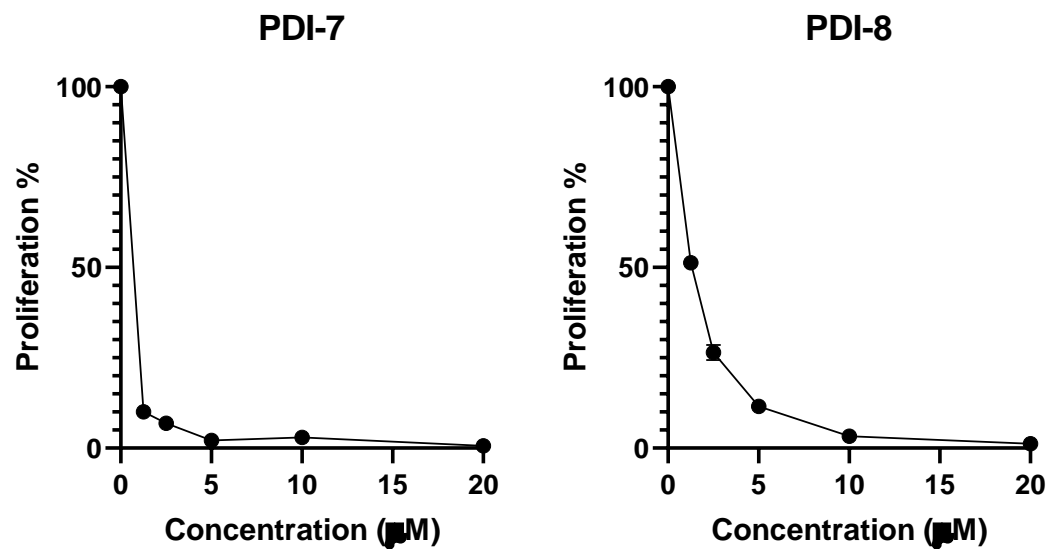

**Figure S24: Dose-response curves of HeLa cells after incubation with cationic PDI-2, -3, -4, and PDI-6, -7, -8 for 24 hours.**
